# Supplementary material for: Disease progression and clinical outcomes in latent osteoarthritis phenotypes: Data from the Osteoarthritis Initiative
Source: bioRxiv or medRxiv preprint supplement (doi:10.1101/2023.12.14.23299525), 2023-12-15

Figure S4

KL grade  
 0 (yellow), 1 (orange), 2 (red), 3 (dark red), 4 (black)

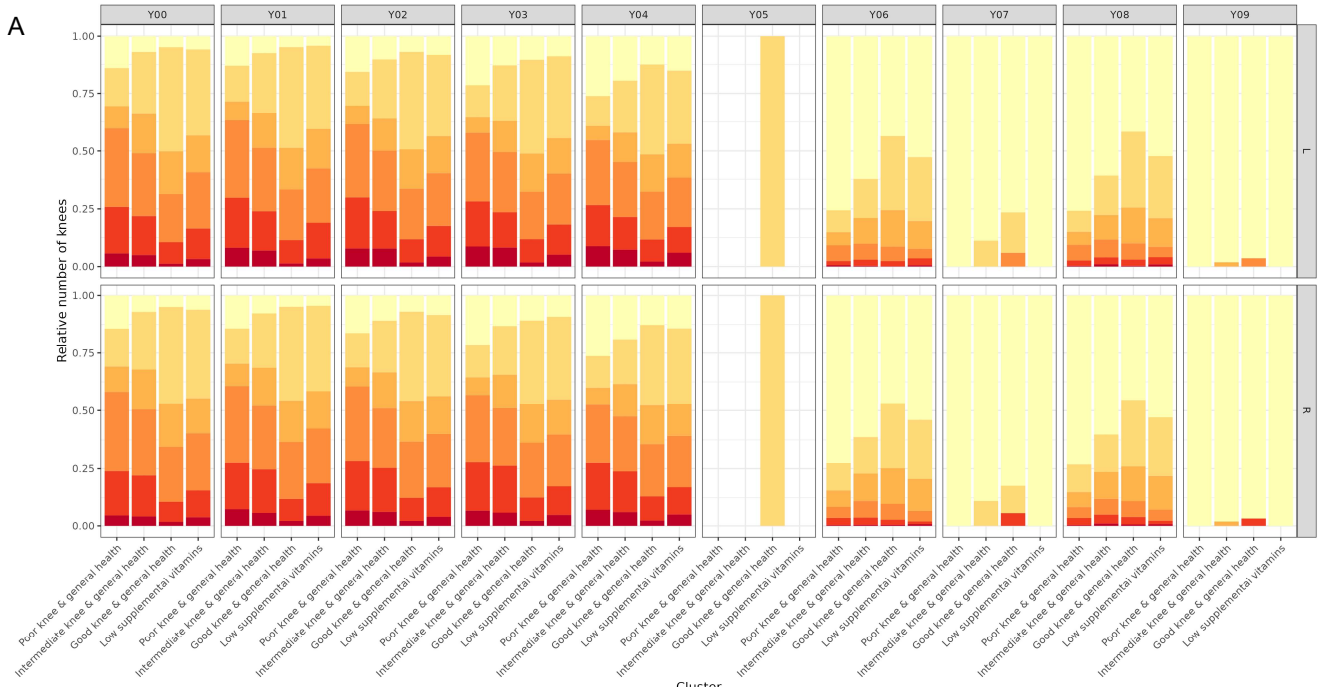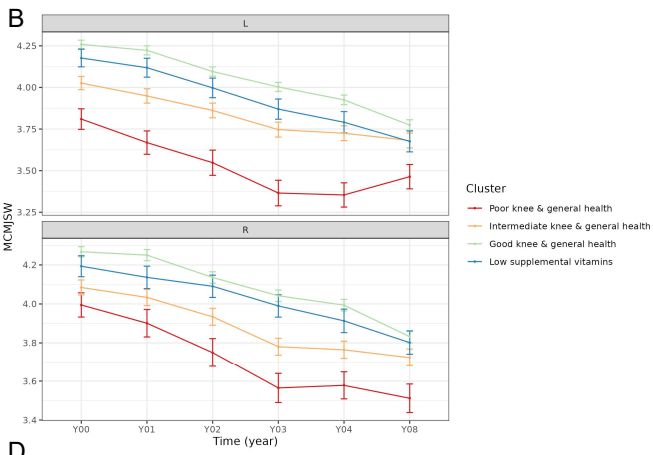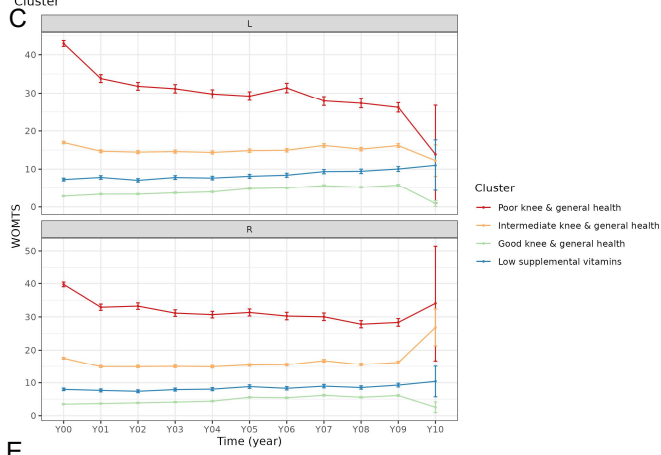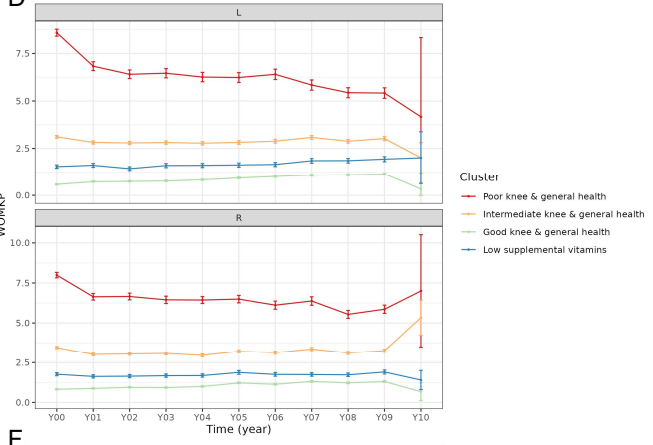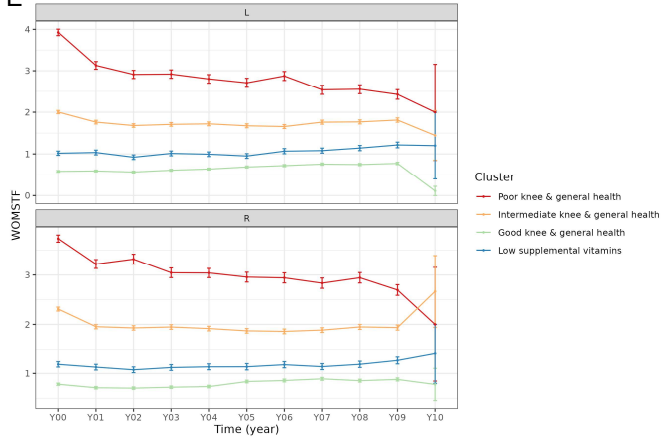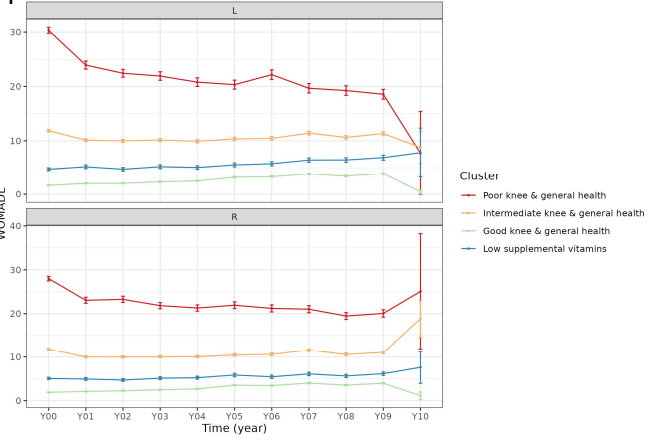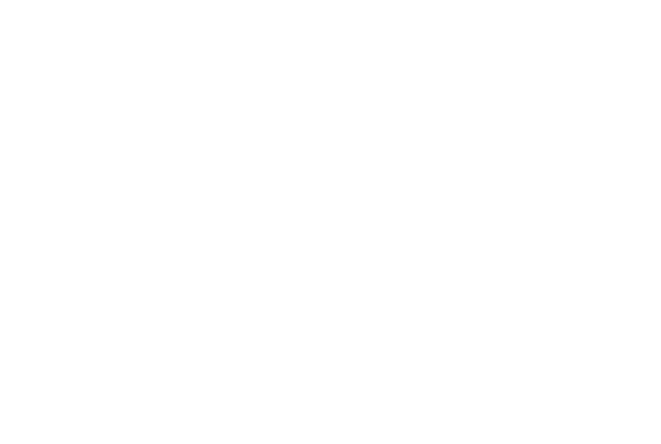

Supplement: Supplementary file [file media-5.pdf]
