# Supplementary material for: Disease progression and clinical outcomes in latent osteoarthritis phenotypes: Data from the Osteoarthritis Initiative
Source: bioRxiv or medRxiv preprint supplement (doi:10.1101/2023.12.14.23299525), 2023-12-15

Figure S5

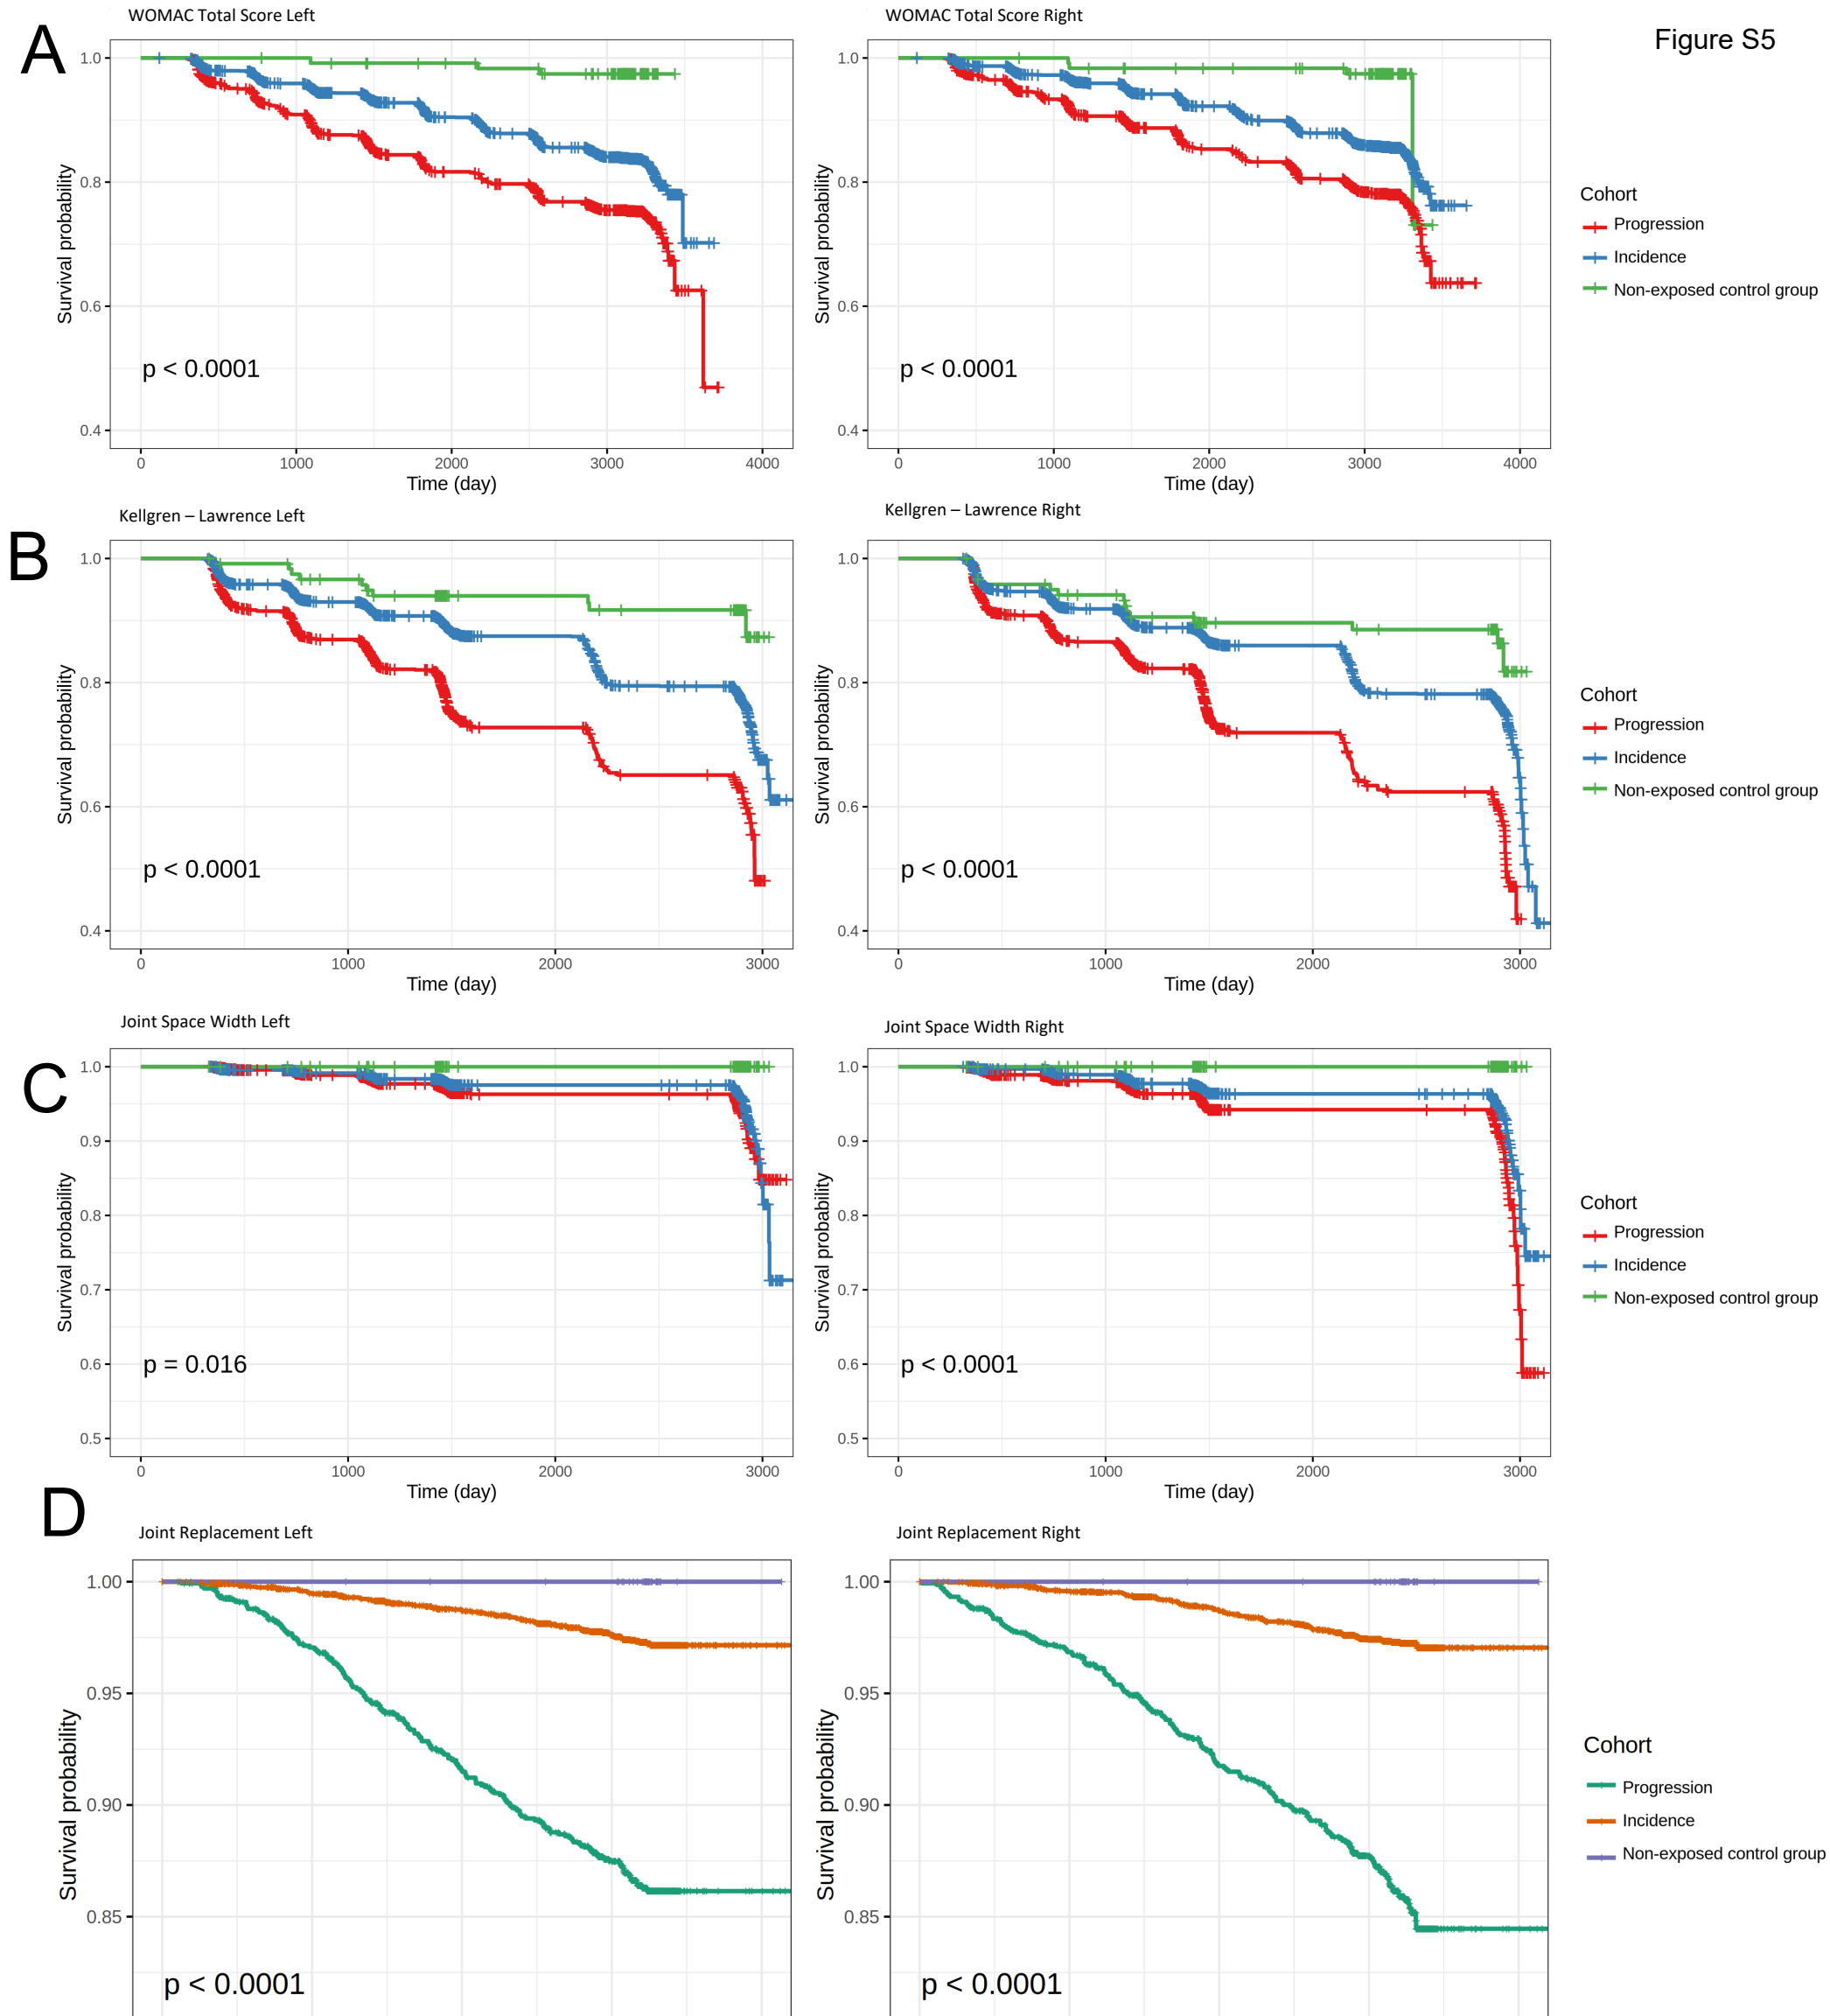

Supplement: Supplementary file [file media-6.pdf]
